# Supplementary material for: Comparisons of Cytokines, Growth Factors and Clinical Efficacy between Platelet-Rich Plasma and Autologous Conditioned Serum for Knee Osteoarthritis Management
Source: Biomolecules. 2023 Mar 17;13(3):555. doi: 10.3390/biom13030555 (PMC10046072; doi:10.3390/biom13030555)
Supplement: Supplementary file 1 [file biomolecules-13-00555-s001.zip › biomolecules-2124041-supplementary.pdf]

## Article

# Comparisons of Cytokines, Growth Factors and Clinical Efficacy between Platelet-Rich Plasma and Autologous Conditioned Serum for Knee Osteoarthritis Management

Pen-Gang Cheng <sup>1</sup>, Kuender D. Yang <sup>2</sup>, Liang-Gie Huang <sup>3</sup>, Chi-Hui Wang <sup>4</sup> and Wang-Sheng Ko <sup>5,\*</sup>

<sup>1</sup> Department of Orthopaedics, Fu-Ya Medical Clinic, Taichung 40764, Taiwan

<sup>2</sup> Department of Medical Research, Mackay Children's Hospital, Taipei 10449, Taiwan;

<sup>3</sup> Department of Medical Research, Mackay Memorial Hospital, Taipei 10449, Taiwan

<sup>4</sup> Department of Stomatology, Taichung Veterans General Hospital, Taichung 40705, Taiwan

<sup>5</sup> Department of Orthopaedics, Cheng-Ching General Hospital, Taichung 40764, Taiwan

<sup>6</sup> Department of Internal Medicine, Kuang-Tien General Hospital, Taichung 43302, Taiwan

\* Correspondence: ker200448@yahoo.com.tw; Tel: +886-1915251829; Fax: +886-422510800

## Supplementary Materials

**Table S1.** Cytokine levels of PRP and ACS.

|                 | PRP<br>(n = 13)               | ACS 1 h<br>(n = 13)                        | ACS 3 h<br>(n = 13)                        | ACS 6 h<br>(n = 13)                         | ACS 24 h<br>(n = 13)                          | p-Value  |
|-----------------|-------------------------------|--------------------------------------------|--------------------------------------------|---------------------------------------------|-----------------------------------------------|----------|
| FGF-1 (pg/mL)   | 110.7<br>(92.2, 128.3)        | 115.1<br>(107.4, 126.4)                    | 101.9<br>(97.5, 126.4)                     | 101.9<br>(95.4, 144.0)                      | 99.9<br>(95.4, 110.7)                         | 0.099    |
| PDGF-BB (pg/mL) | 2035.2<br>(1020.4, 2652.8)    | 11414.8<br>(7970.5, 12979.7) <sup>a</sup>  | 9512.7<br>(8612.1, 12112.8) <sup>a</sup>   | 10001.2<br>(7830.4, 11206.5) <sup>a</sup>   | 10382.5<br>(7893.8, 13500.9) <sup>a</sup>     | <0.001 * |
| IGF-1 (pg/mL)   | 43790.8<br>(36243.5, 54580.2) | 63019.8<br>(46079.0, 69453.9) <sup>a</sup> | 64724.5<br>(47443.9, 82279.1) <sup>a</sup> | 62477.9<br>(51201.5, 77844.3) <sup>a</sup>  | 72194.0<br>(63309.0, 76162.0) <sup>a,b</sup>  | <0.001 * |
| IL-1 Ra (pg/mL) | 157.9<br>(55.4, 214.3)        | 302.0<br>(248.1, 382.3) <sup>a</sup>       | 902.9<br>(731.8, 1318.4) <sup>a,b</sup>    | 1963.0<br>(1537.0, 2753.9) <sup>a,b,c</sup> | 5689.6<br>(3873.4, 7996.2) <sup>a,b,c,d</sup> | <0.001 * |
| TNF-α (pg/mL)   | 3.88<br>(2.28, 4.95)          | 7.40<br>(5.48, 12.96) <sup>a</sup>         | 10.64<br>(8.04, 18.56) <sup>a</sup>        | 14.03<br>(10.31, 20.43) <sup>a,b</sup>      | 53.47<br>(33.23, 67.22) <sup>a,b,c,d</sup>    | <0.001 * |

\*p-Value < 0.05 in the corresponding Friedman's test, which implies at least a significant difference exists between every two conditions of PRP, ACS 1 h, ACS 3 h, ACS 6 h, and ACS 24 h. <sup>a</sup> Indicates a significant difference as compared to PRP;

<sup>b</sup> Indicates a significant difference as compared to ACS 1 h; <sup>c</sup> Indicates a significant difference as compared to ACS 3 h; <sup>d</sup>

Indicates a significant difference as compared to ACS 6 h.
